# Supplementary material for: Simplification of culture conditions and feeder-free expansion of bovine embryonic stem cells
Source: PubMed Central journal article supplement (PMC8155104; doi:10.1038/s41598-021-90422-0), 2021-05-26
Supplement: 41598_2021_90422_MOESM1_ESM.pdf [file 41598_2021_90422_MOESM1_ESM.pdf]

## **Simplification of culture conditions and feeder-free expansion of bovine embryonic stem cells**

Delia Alba Soto<sup>1A</sup>, Micaela Navarro<sup>1AB</sup>, Canbin Zheng<sup>C</sup>, Michelle Halstead<sup>A</sup>, Chuan Zhou<sup>A</sup>, Carly Guiltinan<sup>A</sup>, Jun Wu<sup>C, D</sup>, Pablo Juan Ross<sup>A</sup>.

<sup>1</sup>Contributed equally to this work.

<sup>A</sup>Department of Animal Science, University of California, 450 Bioletti Way, Davis, CA 95616, USA.

<sup>B</sup>Instituto de Investigaciones Biotecnológicas 'Dr Rodolfo Ugalde', UNSAM-CONICET, Buenos Aires, Argentina.

<sup>C</sup>Department of Molecular Biology, University of Texas Southwestern Medical Center, 5323 Harry Hines Boulevard, Dallas, TX 75390, USA.

<sup>D</sup>Hamon Center for Regenerative Science and Medicine, University of Texas Southwestern Medical Center, 5323 Harry Hines Boulevard, Dallas, TX 75390, USA.

### **Corresponding author:**

Pablo Juan Ross, Ph.D., Department of Animal Science, University of California, 450 Bioletti Way, Davis, CA 95616, USA. Telephone: +1 (530) 771-7225; email: [pross@ucdavis.edu](mailto:pross@ucdavis.edu)

# Supplementary Information

## Supplementary Data

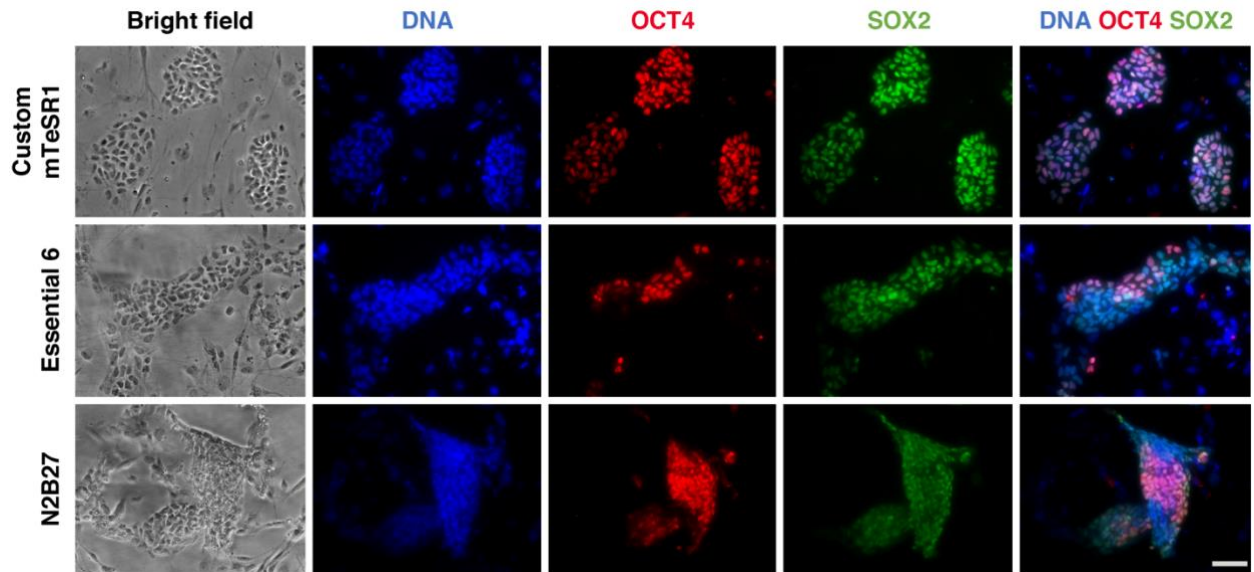

**Figure S1. Adaptation of CTFR-bESC to N2B27 and Essential 6 basal media.** Immunostaining of pluripotency factors OCT4 and SOX2 in CTFR-bESCs cultured in each base medium alternative. Scale bar 100  $\mu$ m.

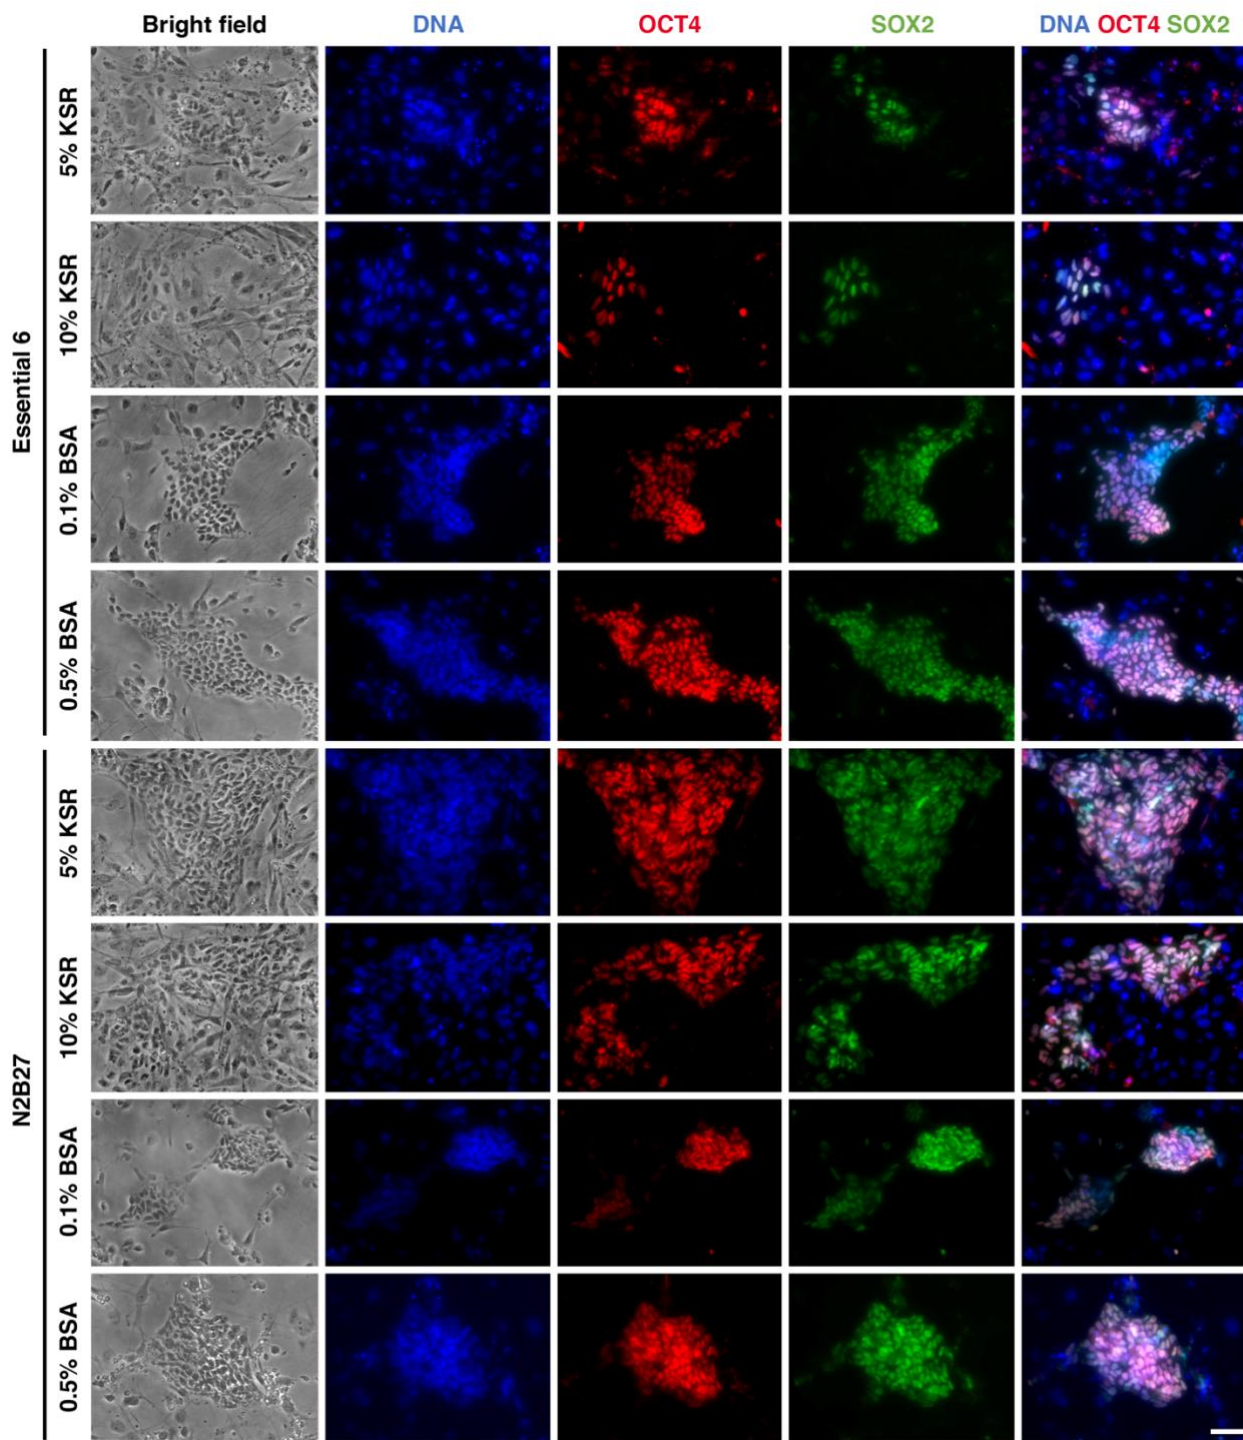

**Figure S2. BSA or KSR supplementation of Essential 6 and N2B27 basal media.**

Immunostaining of pluripotency factors OCT4 and SOX2 in CTFR-bESCs cultured in Essential 6 or N2B27 base medium supplemented with KSR (5% or 10%) or BSA (0.1% or 0.5%). Scale bar 100  $\mu$ m.

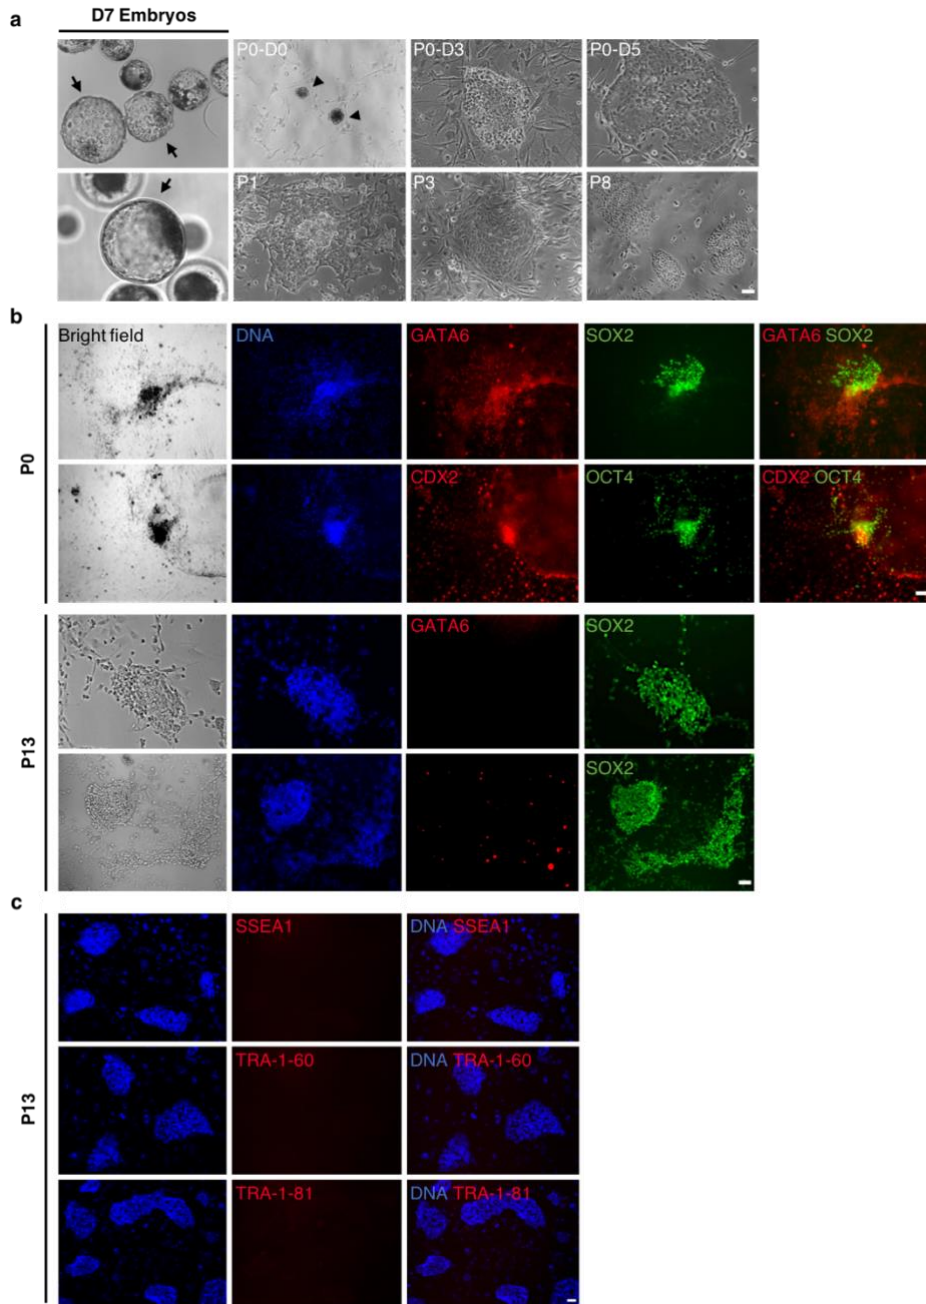

**Figure S3. Establishment of NBFR-bESC lines. (a)** Bright field images of NBFR-bESCs derived from isolated ICMs in NBFR conditions. Representative images of day-7 embryos (arrows) selected for ICMs isolation and ESC derivation, isolated ICMs (arrowheads), outgrowth at passage 0, and typical colony morphology at passages 1, 3, and 8. **(b) Dynamics in the expression of pluripotency** (SOX2, OCT4), trophoblast (CDX2), and primitive endoderm (GATA6) factors during establishment of NBFR-bESC lines and **(c)** their surface marker profile (SSEA1, TRA-1-60 and TRA-1-81) detected by immunofluorescence staining. Red spots observed in CDX2 picture corresponded to unspecific staining. D: day; P: passage. Scale bars 100  $\mu$ m.

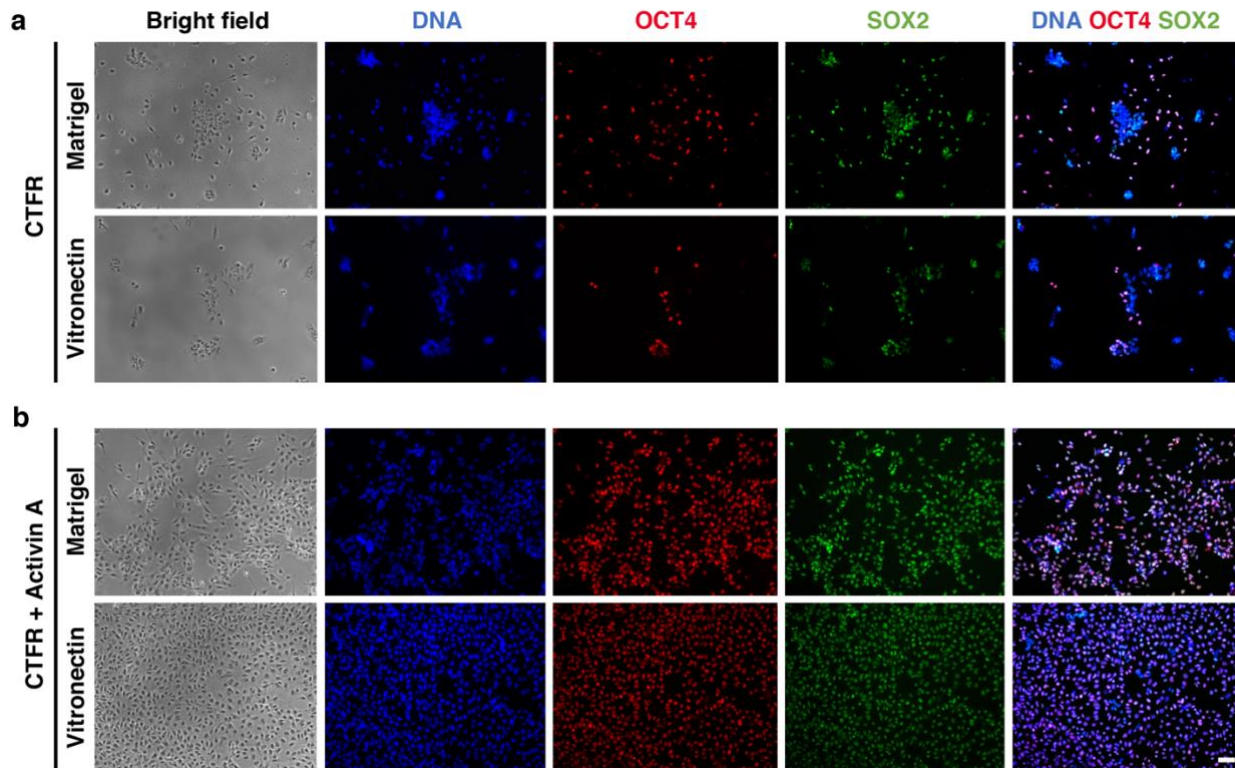

**Figure S4. Adaptation of CTFR-bESCs to feeder-free conditions.** Immunofluorescence of pluripotency factors OCT4 and SOX2 in CTFR-bESCs adapted to different substrates with or without 20 ng/mL Activin A for 4 passages. Scale bar 100  $\mu$ m.

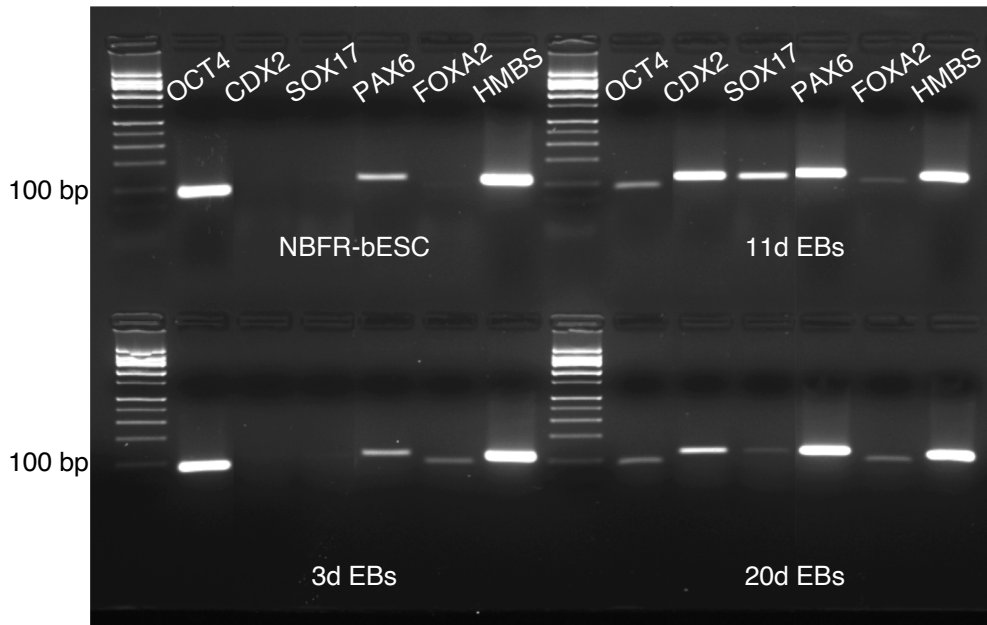

**Figure S5. Full-length gel presented in Figure 3b.** bp: base pairs; d: days; EBs: embryoid bodies.

**Table S1** List of primers used in this study

| <b>Gene</b> | <b>Forward Primer Sequence</b> | <b>Reverse Primer Sequence</b> | <b>T<sub>m</sub> (°C)</b> | <b>Amplicon length</b> |
|-------------|--------------------------------|--------------------------------|---------------------------|------------------------|
| OCT4        | AACGAGAATCTGCAGGAGATATG        | TCTCACTCGGTTCTCGATACT          | 62                        | 87                     |
| NANOG       | CAGCTACAAGCAGGTGAAGA           | CTATTCCTCGGCCAGTTGTT           | 62                        | 84                     |
| SOX2        | CATTAACGGCACACTGCCCC           | TGAAAATGTCTCCCCCGCCC           | 62                        | 76                     |
| SOX17       | AAGATGCTGGGCAAGTCG             | CGGTACTTGTAGTTGGGATGG          | 62                        | 116                    |
| CDX2        | TGGGCAGCCAAGTGAAA              | CTTTCCTCCGGATGGTGATATAG        | 62                        | 120                    |
| MEOX1       | GGAGAATTCAGACAACCAGGAG         | TGAGCAAACCTCAGCTTCGAG          | 62                        | 117                    |
| FOXA2       | CCCTTCTCCATCAACAACCT           | GTAGGCCTTGAGGTCCATTT           | 62                        | 93                     |
| PAX6        | CCCTGGAGAAAGAGTTTGAGAG         | TCCATTTGGCCCTTCGATTAG          | 62                        | 126                    |
| DDX3        | AGGAAGCCAGGAAAGTAA             | CATCCACGTTCTAAGTCT             | 58                        | 184 and 208            |
| HMBS        | CTTCACCATTGGAGCTGTCT           | TAGTTCCTACCACACTCTTCTCT        | 62                        | 116                    |

**Table S2** Summary of reads, alignments and peaks called for each sample

| <b>Histone mark</b> | <b>Sample</b> | <b>Raw reads</b> | <b>Aligned reads</b> | <b>Informative reads</b> | <b>Peaks</b> | <b>FRiP score</b> | <b>Peaks detected in other replicate</b> |
|---------------------|---------------|------------------|----------------------|--------------------------|--------------|-------------------|------------------------------------------|
| H3K4me3             | ESC rep. 1    | 53,571,600       | 46,743,154           | 34,418,223               | 26,048       | 32.21             | 21,636 (83%)                             |
| H3K4me3             | ESC rep. 2    | 48,298,890       | 42,082,536           | 30,904,062               | 23,986       | 32.12             | 21,511 (90%)                             |
| H3K27me3            | ESC rep. 1    | 42,716,486       | 36,372,661           | 26,109,361               | 24,430       | 43.65             | 22,232 (91%)                             |
| H3K27me3            | ESC rep. 2    | 66,047,384       | 56,632,811           | 41,982,903               | 21,244       | 45.13             | 17,691 (83%)                             |
| <i>Average</i>      |               | 52,658,590       | 45,457,791           | 33,353,637               |              |                   |                                          |
